# Supplementary material for: Designing new Togni reagents by computation
Source: Royal Society of Chemistry journal article supplement (doi:10.1039/c9cc01320b), 2019-01-01
Supplement: c9cc01320b1.pdf [file c9cc01320b1.pdf]

# Supporting Information

## Designing New Togni Reagents by Computation

Heming Jiang,<sup>†,#</sup> Tian-Yu Sun,<sup>§,†, ‡,#</sup> Ying Chen,<sup>†,#</sup> Xinhao Zhang,<sup>\*,†</sup> Yun-Dong Wu,<sup>\*,†</sup>

Yaoming Xie,<sup>‡</sup> and Henry F. Schaefer III<sup>\*,‡</sup>

<sup>†</sup>Lab of Computational Chemistry and Drug Design, State Key Laboratory of  
Chemical Oncogenomics, Peking University Shenzhen Graduate School, Shenzhen  
518055, China

<sup>§</sup>Key Laboratory of Bio-Inspired Smart Interfacial Science and Technology of  
Ministry of Education, School of Chemistry, Beihang University, Beijing 100191,  
China

<sup>‡</sup>Center for Computational Quantum Chemistry, University of Georgia, Athens, GA  
30602, USA.

E-mail: qc@uga.edu

### 1. The scan of I-C bond of Togni's reagent II.

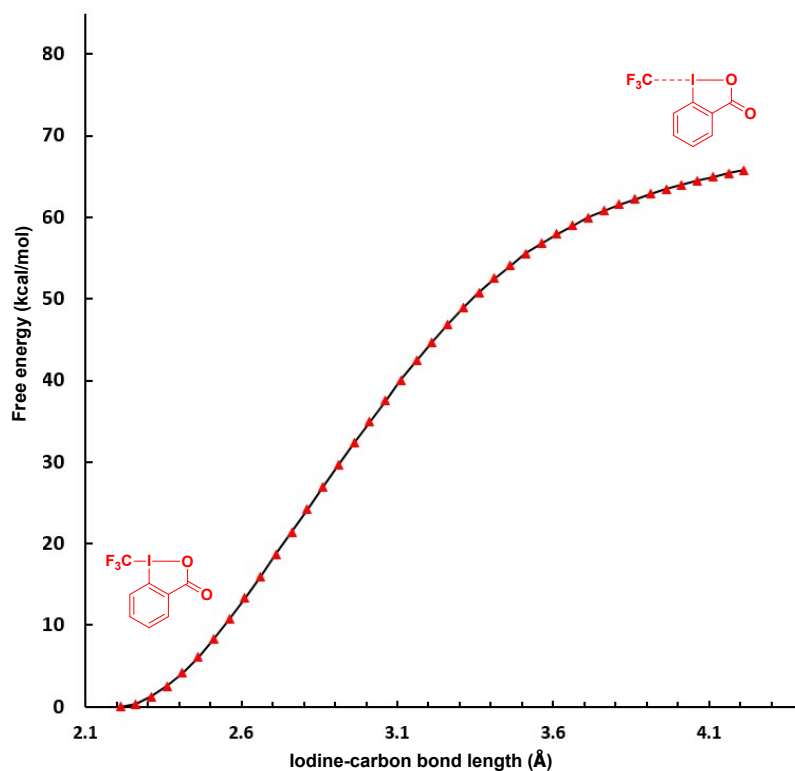

### 3. The protocol of synthetic route to product 1.

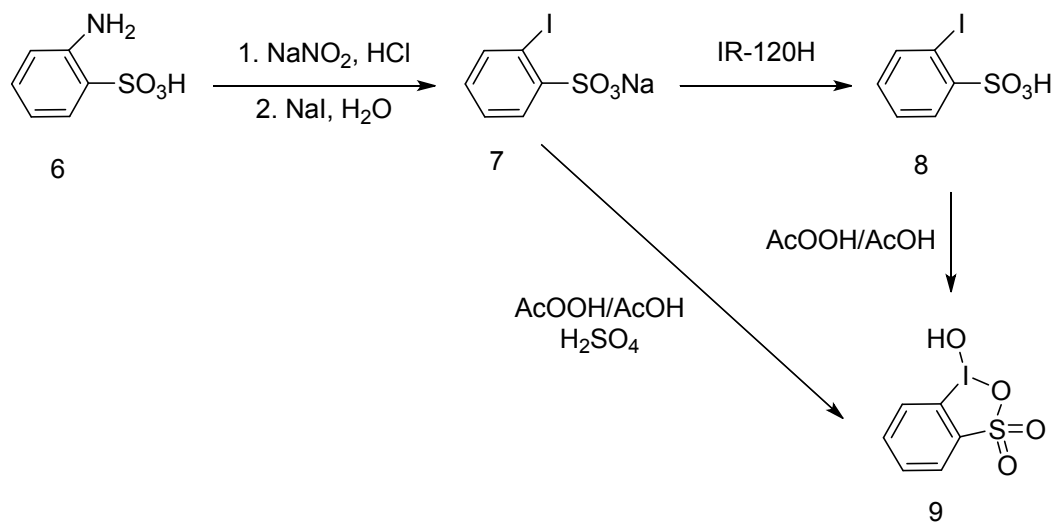

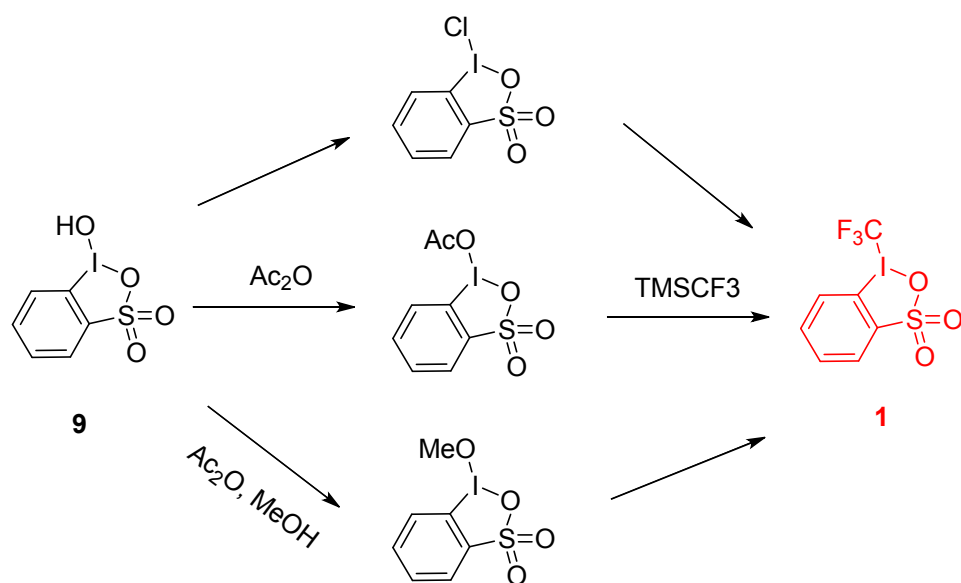

**Figure S3.** The protocol of synthetic method to the product (**1**).<sup>4,5</sup>

Due to interest, we investigate the possibility of synthesize the compound **1** and **1'** (see **Figure S2 & S3**), the most reactive reagents from the computational results, and we look forward to finish this synthesis by synthetic chemists who are interested of it.

#### 4. The computational geometries and the known crystal structure data<sup>6-7</sup> of Togni I and Togni II

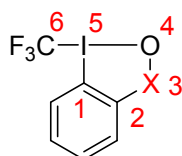

|                      | Togni I |       | Togni II |       |
|----------------------|---------|-------|----------|-------|
|                      | expt.   | Cal.  | expt.    | cal.  |
| bond (Å) 5-4         | 2.283   | 2.263 | 2.118    | 2.105 |
| bond (Å) 5-6         | 2.219   | 2.212 | 2.267    | 2.257 |
| angle (°)<br>2-1-5-4 | 0.3     | 0.0   | 11.6     | 14.3  |

**Figure S4.** The computational geometries and the known crystal structure data of Togni I and Togni II.

## REFERENCES

- (1) Uyanik, M.; Akakura, M.; Ishihara, K. *J. Am. Chem. Soc.* **2009**, *131*, 251.
- (2) Justik, M. *Tetrahedron Lett.* **2007**, *48*, 3003.
- (3) Koser, G. F.; Sun, G.; Porter, C. W.; Youngs, W. J. *J. Org. Chem.* **1993**, *58*, 7310.
- (4) Li, Y.; Hari, D. P.; Vita, M. V.; Waser, J. *Angew. Chem. Int. Ed.* **2016**, *55*, 4436.
- (5) Charpentier, J.; Früh, N.; Togni, A. *Chem. Rev.* **2015**, *115*, 650.
- (6) I. KIELTSCH, P. Eisenberger and A. Togni, *Angew. Chem., Int. Ed.*, **2007**, *46*, 754.
- (7) P. Eisenberger, S. Gischig and A. Togni, *Chem. Eur. J.*, **2006**, *12*, 2579.

**Cartesian coordinates (in Å) of related structures which calculated at the M06-2X/ cc-pVQZ(-pp) level of theory.**

|                       |             |             |             |                  |             |             |             |
|-----------------------|-------------|-------------|-------------|------------------|-------------|-------------|-------------|
| <b>CF<sub>3</sub></b> |             |             |             | F                | 3.04605500  | -1.29777000 | 1.16839600  |
| C                     | 0.00000000  | 0.00000000  | -0.00008700 | O                | -1.70935300 | -1.63352800 | -1.01232300 |
| F                     | 0.00000000  | 1.22642200  | 0.00001900  | S                | -2.39370800 | -1.06470500 | 0.15796400  |
| F                     | 1.06211300  | -0.61321100 | 0.00001900  | O                | -1.98383700 | -1.67976800 | 1.40104600  |
| F                     | -1.06211300 | -0.61321100 | 0.00001900  | O                | -3.81751500 | -0.92762700 | -0.01771800 |
| <b>1</b>              |             |             |             | C                | 1.46271000  | 2.48397500  | -0.84866300 |
| C                     | 0.19822700  | 2.12804400  | -0.28326600 | H                | 1.83632000  | 1.73934100  | -1.54822000 |
| C                     | -0.35503200 | 0.86793400  | -0.15518400 | H                | 2.17963300  | 2.59297200  | -0.03595100 |
| C                     | -1.71057200 | 0.66968800  | 0.03053600  | H                | 1.41769100  | 3.43830500  | -1.36725200 |
| C                     | -2.54060700 | 1.77820200  | 0.11859800  | <b>1- anion</b>  |             |             |             |
| C                     | -2.00792400 | 3.05390000  | 0.02031700  | C                | 0.26497300  | 2.32789700  | 0.00006500  |
| C                     | -0.64790900 | 3.22533300  | -0.18620200 | C                | 0.11755700  | 0.94683700  | 0.00007000  |
| H                     | -3.60294300 | 1.62792600  | 0.25167400  | C                | -1.14989000 | 0.36914100  | 0.00005200  |
| H                     | -2.65851600 | 3.91364000  | 0.08793500  | C                | -2.26175100 | 1.20561700  | -0.00001100 |
| H                     | -0.22955100 | 4.21628900  | -0.28726500 | C                | -2.12185700 | 2.58514300  | -0.00004500 |
| I                     | 0.86044300  | -0.87096200 | -0.26782800 | C                | -0.85547600 | 3.14709200  | 0.00000700  |
| H                     | 1.24814400  | 2.28450100  | -0.47157800 | H                | -3.24176800 | 0.75226100  | -0.00003200 |
| C                     | 2.71421800  | 0.18332700  | 0.24707200  | H                | -3.00034200 | 3.21481400  | -0.00011400 |
| F                     | 2.54241000  | 0.97620500  | 1.29092100  | H                | -0.72907600 | 4.22059200  | -0.00000700 |
| F                     | 3.19213100  | 0.90133700  | -0.75654400 | I                | 1.90059300  | -0.17269600 | -0.00001000 |
| F                     | 3.60700200  | -0.74361000 | 0.55778200  | H                | 1.25354100  | 2.76362600  | 0.00009900  |
| O                     | -1.42400500 | -1.75291500 | -0.64476100 | O                | -0.80910800 | -1.89485400 | -1.21693600 |
| S                     | -2.39760400 | -0.97245000 | 0.15029900  | S                | -1.43623400 | -1.40963700 | 0.00000500  |
| O                     | -2.36919000 | -1.31822100 | 1.55069200  | O                | -2.88115900 | -1.55199100 | -0.00001500 |
| O                     | -3.70371000 | -0.92462500 | -0.45234400 | O                | -0.80915400 | -1.89497900 | 1.21690800  |
| <b>1'</b>             |             |             |             | <b>1'- anion</b> |             |             |             |
| C                     | 0.09692800  | 2.14289700  | -0.33371300 | C                | 1.24567600  | 1.80824800  | -0.00000400 |
| C                     | -0.41343300 | 0.86167000  | -0.16615300 | C                | 0.42018300  | 0.67801300  | -0.00004800 |
| C                     | -1.73215300 | 0.60170100  | 0.18543400  | C                | -0.97013700 | 0.79558500  | 0.00004400  |
| C                     | -2.56831100 | 1.66443900  | 0.47049100  | C                | -1.54011400 | 2.06334700  | -0.00017100 |
| C                     | -2.07671900 | 2.96086800  | 0.39633600  | C                | -0.74131600 | 3.19480500  | -0.00018400 |
| C                     | -0.77895400 | 3.18783700  | -0.01555000 | C                | 0.63484400  | 3.06190900  | 0.00004300  |
| H                     | -3.60050000 | 1.46766900  | 0.72113000  | H                | -2.61612700 | 2.14466600  | -0.00013000 |
| H                     | -2.72316300 | 3.79607900  | 0.62473000  | H                | -1.19328300 | 4.17688300  | -0.00039600 |
| H                     | -0.41581100 | 4.20063800  | -0.12626200 | H                | 1.26367500  | 3.94220200  | 0.00009500  |
| I                     | 0.78768500  | -0.85809500 | -0.53514600 | I                | 1.36772500  | -1.20885600 | -0.00044700 |
| C                     | 2.55573000  | -0.21203600 | 0.59957400  | O                | -1.80988900 | -1.34353800 | -1.21705700 |
| F                     | 2.20490100  | 0.64982500  | 1.53303400  | S                | -2.10619300 | -0.60847600 | 0.00052800  |
| F                     | 3.49001000  | 0.32112100  | -0.16003500 | O                | -3.42978600 | -0.01026000 | -0.00000200 |

|   |             |             |             |
|---|-------------|-------------|-------------|
| O | -1.81032600 | -1.34238600 | 1.21890700  |
| C | 2.74462400  | 1.72987500  | 0.00029000  |
| H | 3.10971100  | 1.19513100  | 0.87719300  |
| H | 3.11014100  | 1.19576900  | -0.87682200 |
| H | 3.17298500  | 2.72908900  | 0.00073300  |

## 2

|   |             |             |             |
|---|-------------|-------------|-------------|
| C | 1.69379400  | 0.73216400  | 0.03086000  |
| C | 0.32103600  | 0.89579900  | 0.06934300  |
| I | -0.83086000 | -0.90065600 | 0.13094800  |
| C | 2.47881300  | 1.88440000  | 0.00424700  |
| C | 1.89675300  | 3.14055500  | 0.00806400  |
| C | 0.51558300  | 3.26161500  | 0.04826700  |
| C | -0.29440400 | 2.13400600  | 0.08321600  |
| H | 3.55569600  | 1.78020800  | -0.01159000 |
| H | 2.51738500  | 4.02477100  | -0.01140100 |
| H | 0.05153200  | 4.23746300  | 0.06215300  |
| H | -1.36249100 | 2.26059100  | 0.13176100  |
| P | 2.45907900  | -0.91196400 | 0.04101100  |
| O | 3.67238600  | -0.93574500 | 0.87594800  |
| C | -2.76433700 | 0.13386400  | -0.11662300 |
| F | -3.09851400 | 0.90218700  | 0.91731200  |
| F | -2.83412800 | 0.87728200  | -1.21699800 |
| F | -3.68051800 | -0.82805100 | -0.21604900 |
| O | 1.28344200  | -1.81660700 | 0.35656800  |
| O | 2.80841500  | -1.19909100 | -1.49812300 |
| H | 3.70833700  | -0.93443900 | -1.72413300 |

## 2'

|   |             |             |             |
|---|-------------|-------------|-------------|
| C | -1.71407100 | 0.69163800  | 0.19201800  |
| C | -0.38293100 | 0.90448600  | -0.14424000 |
| I | 0.71352600  | -0.91395900 | -0.45659000 |
| C | -2.49481100 | 1.80061700  | 0.48242300  |
| C | -1.94148700 | 3.07252900  | 0.42823100  |
| C | -0.63544100 | 3.23890000  | 0.00965200  |
| C | 0.19069700  | 2.15604900  | -0.31917800 |
| H | -3.53949000 | 1.65783000  | 0.72180200  |
| H | -2.54394300 | 3.93746100  | 0.66714000  |
| H | -0.22779100 | 4.23467600  | -0.10435400 |
| P | -2.45424300 | -0.96249600 | 0.01349900  |
| O | -3.90163300 | -0.86322400 | -0.24147200 |
| C | 2.57226600  | -0.24340100 | 0.52344400  |
| F | 3.50739400  | 0.21781800  | -0.29448900 |
| F | 2.33272300  | 0.67109800  | 1.45394800  |

|   |             |             |             |
|---|-------------|-------------|-------------|
| F | 3.06722700  | -1.32406000 | 1.12337900  |
| O | -1.52145500 | -1.61323100 | -0.98568500 |
| O | -2.15229100 | -1.70603800 | 1.40637300  |
| H | -2.83089800 | -1.53321600 | 2.07000500  |
| C | 1.55249400  | 2.43964200  | -0.87984400 |
| H | 1.88072200  | 1.66269900  | -1.56715700 |
| H | 2.29801200  | 2.55420900  | -0.09510100 |
| H | 1.51680200  | 3.37710100  | -1.42984800 |

## 2- anion

|   |             |             |             |
|---|-------------|-------------|-------------|
| C | -1.11846700 | 0.45304300  | -0.03955200 |
| C | 0.17667300  | 0.96879800  | -0.00808300 |
| I | 1.88977100  | -0.26517900 | -0.00124800 |
| C | -2.16662100 | 1.37733500  | -0.03599300 |
| C | -1.94174000 | 2.74560000  | -0.00524700 |
| C | -0.64212800 | 3.22635400  | 0.02902500  |
| C | 0.42207400  | 2.33583100  | 0.02962200  |
| H | -3.17576300 | 0.99036200  | -0.05562400 |
| H | -2.77747200 | 3.43148400  | -0.00536800 |
| H | -0.44755900 | 4.28955500  | 0.05651200  |
| H | 1.43651900  | 2.70610200  | 0.05882000  |
| P | -1.57057600 | -1.32944100 | -0.11783900 |
| O | -0.86850000 | -1.95328600 | -1.26598600 |
| O | -3.04994000 | -1.40594700 | 0.02452900  |
| O | -0.89634100 | -1.92209800 | 1.23851400  |
| H | -1.49546100 | -1.81249300 | 1.98432200  |

## 2'- anion

|   |             |             |             |
|---|-------------|-------------|-------------|
| C | -0.89215900 | 0.87893000  | -0.03330000 |
| C | 0.48846600  | 0.66973800  | -0.01319600 |
| I | 1.28043600  | -1.29616100 | -0.00372700 |
| C | -1.34162000 | 2.20065300  | -0.02723400 |
| C | -0.45563800 | 3.26496300  | -0.00735400 |
| C | 0.90612200  | 3.02098800  | 0.01151900  |
| C | 1.41091200  | 1.72110400  | 0.01181600  |
| H | -2.40830200 | 2.37091700  | -0.03805000 |
| H | -0.82491300 | 4.28133000  | -0.00556400 |
| H | 1.60585300  | 3.84624200  | 0.02769000  |
| P | -2.19492800 | -0.42326100 | -0.11626900 |
| O | -1.90650500 | -1.32033400 | -1.26209100 |
| O | -3.50560700 | 0.27063000  | 0.01397200  |
| O | -1.94011200 | -1.27613900 | 1.24584800  |
| H | -2.42345400 | -0.88140000 | 1.97920800  |
| C | 2.89793100  | 1.51796100  | 0.03604400  |

|   |            |            |             |
|---|------------|------------|-------------|
| H | 3.20483200 | 0.95373600 | 0.91675700  |
| H | 3.23333200 | 0.95666600 | -0.83615400 |
| H | 3.40713700 | 2.47865700 | 0.04609600  |

### 3

|   |             |             |             |
|---|-------------|-------------|-------------|
| C | 0.08198100  | 2.07388800  | -0.00024000 |
| C | 0.52141300  | 0.76225500  | -0.00006200 |
| C | 1.85718500  | 0.42468000  | 0.00008200  |
| C | 2.80276200  | 1.44278900  | 0.00007800  |
| C | 2.39554100  | 2.76533900  | -0.00008400 |
| C | 1.04163900  | 3.07640600  | -0.00024900 |
| H | 3.85346900  | 1.18660900  | 0.00020800  |
| H | 3.13139400  | 3.55651400  | -0.00009000 |
| H | 0.71953900  | 4.10788300  | -0.00038600 |
| I | -0.77933700 | -0.90756200 | -0.00002600 |
| H | -0.96165400 | 2.34146400  | -0.00036700 |
| C | -2.60553800 | 0.33201700  | -0.00005600 |
| F | -2.73295100 | 1.10722900  | 1.07513800  |
| F | -2.73309400 | 1.10710000  | -1.07533300 |
| F | -3.62693700 | -0.52737300 | 0.00006400  |
| O | 1.27290200  | -1.86568400 | 0.00033200  |
| C | 2.25738400  | -1.03690400 | 0.00019100  |
| F | 3.11668200  | -1.24406200 | -1.08180200 |
| F | 3.11682300  | -1.24389600 | 1.08209000  |

### 3'

|   |             |             |             |
|---|-------------|-------------|-------------|
| C | -2.6694000  | 2.07535800  | -0.26336100 |
| C | -0.62406400 | 0.74175900  | -0.11474700 |
| C | -1.91742700 | 0.32261300  | 0.14990800  |
| C | -2.89451900 | 1.26978100  | 0.40016900  |
| C | -2.56371500 | 2.61539400  | 0.34950600  |
| C | -1.28282000 | 3.00086500  | -0.00128700 |
| H | -3.90673300 | 0.95092600  | 0.60337400  |
| H | -3.31827900 | 3.36569700  | 0.53746200  |
| H | -1.04820800 | 4.05134000  | -0.10994600 |
| I | 0.69482600  | -0.92072100 | -0.35461800 |
| C | 2.54891600  | 0.03185000  | 0.40096500  |
| F | 2.32594700  | 0.87244400  | 1.40685700  |
| F | 3.30707200  | 0.64695300  | -0.49867700 |
| F | 3.26410500  | -0.99137100 | 0.87868300  |
| O | -1.39518600 | -1.81222600 | -0.68794300 |
| C | -2.22929700 | -1.16009500 | 0.04399000  |
| F | -3.53414500 | -1.30414800 | -0.40094300 |
| F | -2.31190300 | -1.67618000 | 1.35140700  |

|   |            |            |             |
|---|------------|------------|-------------|
| C | 1.05846300 | 2.57655800 | -0.75140200 |
| H | 1.50024000 | 1.88814600 | -1.46866700 |
| H | 1.76216400 | 2.73212700 | 0.06369500  |
| H | 0.91526800 | 3.53400800 | -1.24601900 |

### 3- anion

|   |             |             |             |
|---|-------------|-------------|-------------|
| C | 0.01839300  | 2.16978700  | -0.00418100 |
| C | -0.00179600 | 0.77507000  | -0.01013900 |
| C | -1.20423800 | 0.07960700  | -0.01435100 |
| C | -2.38515100 | 0.82937000  | -0.00401200 |
| C | -2.37738200 | 2.21071300  | 0.00271200  |
| C | -1.16392700 | 2.88679700  | 0.00061700  |
| H | -3.32531500 | 0.29678000  | -0.00298300 |
| H | -3.30942800 | 2.75809500  | 0.00919700  |
| H | -1.13354800 | 3.96740400  | 0.00411700  |
| I | 1.91046900  | -0.11932800 | 0.00084100  |
| H | 0.96441500  | 2.69070000  | -0.00259800 |
| O | -0.36678900 | -2.19359000 | -0.11044400 |
| C | -1.33560800 | -1.44857900 | -0.01949700 |
| F | -2.17243400 | -1.72062900 | 1.16720400  |
| F | -2.36294700 | -1.70786400 | -1.04227400 |

### 3'- anion

|   |             |             |             |
|---|-------------|-------------|-------------|
| C | 0.39323500  | 2.01771400  | 0.01760400  |
| C | 0.02779400  | 0.66835000  | -0.01775900 |
| C | -1.30846100 | 0.26158300  | -0.04787000 |
| C | -2.29175400 | 1.24656700  | -0.05494300 |
| C | -1.95659800 | 2.59080900  | -0.03158200 |
| C | -0.62739100 | 2.96780400  | 0.00729400  |
| H | -3.32855900 | 0.95095300  | -0.07963200 |
| H | -2.73471700 | 3.34163700  | -0.04104800 |
| H | -0.35976700 | 4.01588900  | 0.03061500  |
| I | 1.59706000  | -0.75018100 | -0.01496300 |
| O | -1.35058500 | -1.87255200 | -1.12825500 |
| C | -1.70782400 | -1.21562800 | -0.15066000 |
| F | -1.30494000 | -1.79934500 | 1.14384300  |
| F | -3.14748500 | -1.25695300 | 0.07348400  |
| C | 1.81932300  | 2.48450700  | 0.06488000  |
| H | 2.33108700  | 2.09885900  | 0.94672500  |
| H | 2.37651500  | 2.13830000  | -0.80587900 |
| H | 1.85783700  | 3.57083300  | 0.09057300  |

### 4

|   |             |            |            |
|---|-------------|------------|------------|
| C | -1.64319400 | 1.15612500 | 0.00000000 |
|---|-------------|------------|------------|

|   |             |             |             |
|---|-------------|-------------|-------------|
| C | -0.27799100 | 0.94438300  | 0.00000000  |
| C | 0.64425400  | 1.97297400  | 0.00000000  |
| C | 0.17213100  | 3.28011500  | 0.00000000  |
| C | -1.18962100 | 3.52947400  | 0.00000000  |
| C | -2.08986500 | 2.47187700  | 0.00000000  |
| H | -2.36247900 | 0.35409800  | 0.00000000  |
| H | 0.89302400  | 4.08514900  | 0.00000000  |
| H | -1.55327400 | 4.54673000  | 0.00000000  |
| H | -3.15356100 | 2.66195600  | 0.00000000  |
| C | 2.12178000  | 1.67301400  | 0.00000000  |
| O | 2.39511700  | 0.41687300  | 0.00000000  |
| I | 0.60966300  | -0.97158900 | 0.00000000  |
| C | -1.34218900 | -2.03031400 | 0.00000000  |
| F | -2.08986500 | -1.78266600 | 1.07524200  |
| F | -1.06124100 | -3.33476000 | 0.00000000  |
| F | -2.08986500 | -1.78266600 | -1.07524200 |
| O | 2.93751600  | 2.57828400  | 0.00000000  |

#### 4'

|   |             |             |             |
|---|-------------|-------------|-------------|
| C | -0.72943200 | 1.90680900  | -0.24696200 |
| C | -0.90058900 | 0.53922600  | -0.07933800 |
| C | -2.12763700 | -0.05820900 | 0.16614800  |
| C | -3.23207400 | 0.75503400  | 0.36838200  |
| C | -3.09652500 | 2.13087800  | 0.29302200  |
| C | -1.87151600 | 2.68526300  | -0.03407200 |
| H | -4.18764700 | 0.28619100  | 0.55431600  |
| H | -3.95253300 | 2.77211400  | 0.44761400  |
| H | -1.78026300 | 3.75632300  | -0.15731600 |
| C | -2.29386100 | -1.55744400 | 0.07553800  |
| O | -1.26220500 | -2.16012300 | -0.39205400 |
| I | 0.65183200  | -0.92335500 | -0.23176100 |
| C | 2.44387200  | 0.26880100  | 0.32626600  |
| F | 3.02559600  | 0.97342500  | -0.63734700 |
| F | 3.31816900  | -0.67413300 | 0.69812200  |
| F | 2.25287400  | 1.06814400  | 1.37159000  |
| O | -3.34911900 | -2.08113900 | 0.39031300  |
| C | 0.53204700  | 2.57536300  | -0.69826300 |
| H | 1.21360600  | 2.76333600  | 0.12864600  |
| H | 1.04506000  | 1.97325900  | -1.44470200 |
| H | 0.28979700  | 3.53546700  | -1.14688100 |

#### 4- anion

|   |             |             |             |
|---|-------------|-------------|-------------|
| C | -0.93180100 | -1.87772300 | -0.00497700 |
| C | -0.42832500 | -0.58321300 | -0.00483300 |

|   |             |             |             |
|---|-------------|-------------|-------------|
| C | -1.25953600 | 0.52868700  | -0.00454800 |
| C | -2.63699200 | 0.30692500  | -0.00213700 |
| C | -3.15924800 | -0.97705700 | -0.00556500 |
| C | -2.30540300 | -2.07273100 | -0.00736800 |
| H | -0.26100300 | -2.72473600 | -0.00317100 |
| H | -3.30203400 | 1.16141200  | 0.00212500  |
| H | -4.23034600 | -1.12453200 | -0.00571400 |
| H | -2.70183300 | -3.07838100 | -0.00925400 |
| C | -0.73817800 | 1.96451600  | -0.00990000 |
| O | -0.49283200 | 2.44280600  | -1.13285500 |
| O | -0.63552200 | 2.50407400  | 1.10728100  |
| I | 1.66564000  | -0.33104200 | 0.00861500  |

#### 4'- anion

|   |             |             |             |
|---|-------------|-------------|-------------|
| C | 0.99783300  | -1.66645600 | 0.00402000  |
| C | 0.45088600  | -0.38034300 | 0.00393500  |
| C | 1.23242800  | 0.76797200  | 0.00376900  |
| C | 2.61850300  | 0.62036100  | 0.00145300  |
| C | 3.19340800  | -0.63901700 | 0.00443100  |
| C | 2.38744700  | -1.76845800 | 0.00603800  |
| H | 3.24103500  | 1.50600100  | -0.00215900 |
| H | 4.26964800  | -0.74517200 | 0.00455800  |
| H | 2.83469500  | -2.75366800 | 0.00769600  |
| C | 0.64966700  | 2.18061300  | 0.01011100  |
| O | 0.52182100  | 2.71568800  | -1.10677600 |
| O | 0.39112500  | 2.65079900  | 1.13365100  |
| I | -1.65270600 | -0.16003700 | -0.00846400 |
| C | 0.15854500  | -2.90981500 | 0.00247100  |
| H | -0.49243900 | -2.94432400 | 0.87634200  |
| H | -0.48545900 | -2.94696000 | -0.87647400 |
| H | 0.79006400  | -3.79497800 | 0.00625200  |

#### 5

|   |             |             |             |
|---|-------------|-------------|-------------|
| C | -0.38312000 | 1.99718800  | 0.00000900  |
| C | -0.75833000 | 0.66747000  | -0.00013100 |
| C | -2.06866300 | 0.22667700  | 0.00001700  |
| C | -3.06212500 | 1.20694600  | 0.00029000  |
| C | -2.73434800 | 2.55387900  | 0.00039900  |
| C | -1.40123000 | 2.94362900  | 0.00025800  |
| H | -4.09975500 | 0.89977400  | 0.00041500  |
| H | -3.51368100 | 3.30308900  | 0.00062200  |
| H | -1.13992500 | 3.99262700  | 0.00035000  |
| I | 0.64488600  | -0.94284400 | -0.00047300 |
| H | 0.64223200  | 2.32663400  | -0.00009200 |



|                 |             |             |             |                  |             |             |             |
|-----------------|-------------|-------------|-------------|------------------|-------------|-------------|-------------|
| B               | -2.30423000 | -1.33577700 | -0.00012200 | H                | 0.29069000  | -2.75887200 | -0.02886300 |
| O               | -3.59693900 | -1.79961900 | 0.00031700  | B                | 0.71454100  | 2.04387500  | 0.09866000  |
| H               | -3.63232800 | -2.76159900 | 0.00044400  | O                | 0.36223000  | 2.51995600  | -1.19212700 |
| C               | 2.38050500  | 0.45975300  | 0.00034900  | H                | 0.04418200  | 3.42327100  | -1.10221600 |
| F               | 2.46947000  | 1.25223400  | -1.07564700 | O                | 0.64869300  | 2.71671300  | 1.19669400  |
| F               | 2.46842100  | 1.25225600  | 1.07642200  |                  |             |             |             |
| F               | 3.47553500  | -0.31577800 | 0.00085100  |                  |             |             |             |
| O               | -1.21197300 | -2.09319900 | -0.00004800 |                  |             |             |             |
|                 |             |             |             | <b>5'- anion</b> |             |             |             |
|                 |             |             |             | C                | -1.14295700 | 1.62016200  | -0.01344700 |
|                 |             |             |             | C                | -0.51166300 | 0.37350500  | 0.00534500  |
|                 |             |             |             | C                | -1.17725800 | -0.84727100 | 0.02226500  |
|                 |             |             |             | C                | -2.57625100 | -0.78394700 | 0.01428400  |
|                 |             |             |             | C                | -3.25088600 | 0.42632100  | -0.00793400 |
|                 |             |             |             | C                | -2.53683800 | 1.61552000  | -0.02059200 |
|                 |             |             |             | H                | -3.14316100 | -1.70758200 | 0.02770300  |
|                 |             |             |             | H                | -4.33253500 | 0.44848500  | -0.01504800 |
|                 |             |             |             | H                | -3.05954000 | 2.56317100  | -0.03628900 |
|                 |             |             |             | I                | 1.61731900  | 0.33151000  | 0.01574700  |
|                 |             |             |             | B                | -0.45211300 | -2.29439900 | 0.10217300  |
|                 |             |             |             | O                | -0.12984100 | -2.76142500 | -1.20016500 |
|                 |             |             |             | H                | 0.29350100  | -3.62095500 | -1.11443700 |
|                 |             |             |             | O                | -0.24705600 | -2.93055300 | 1.20500200  |
|                 |             |             |             | C                | -0.40129000 | 2.92465100  | -0.02626400 |
|                 |             |             |             | H                | 0.23212200  | 3.02551000  | 0.85583700  |
|                 |             |             |             | H                | 0.25058700  | 2.99804700  | -0.89734600 |
|                 |             |             |             | H                | -1.10029400 | 3.75746900  | -0.04649500 |
|                 |             |             |             |                  |             |             |             |
|                 |             |             |             | <b>6</b>         |             |             |             |
|                 |             |             |             | C                | 0.39060100  | 1.96977700  | 0.38875600  |
|                 |             |             |             | C                | 0.69003200  | 0.64670000  | 0.15200600  |
|                 |             |             |             | C                | 1.96876600  | 0.19120100  | -0.16176100 |
|                 |             |             |             | C                | 2.98513000  | 1.14541900  | -0.25693800 |
|                 |             |             |             | C                | 2.69756400  | 2.48422300  | -0.03656600 |
|                 |             |             |             | C                | 1.41625000  | 2.90401300  | 0.29392400  |
|                 |             |             |             | H                | 3.99298000  | 0.84215600  | -0.49678300 |
|                 |             |             |             | H                | 3.49609200  | 3.20953100  | -0.10921300 |
|                 |             |             |             | H                | 1.20856200  | 3.94670900  | 0.48333700  |
|                 |             |             |             | I                | -0.68403000 | -0.94510300 | 0.15114000  |
|                 |             |             |             | H                | -0.60740100 | 2.28564500  | 0.65151000  |
|                 |             |             |             | C                | -2.38147400 | 0.47399800  | -0.19242600 |
|                 |             |             |             | F                | -2.72376200 | 1.23761700  | 0.85492000  |
|                 |             |             |             | F                | -2.18083700 | 1.30105100  | -1.22665800 |
|                 |             |             |             | F                | -3.45810100 | -0.26983400 | -0.49023500 |
|                 |             |             |             | N                | 2.12668800  | -1.17113600 | -0.39534700 |
|                 |             |             |             | O                | 1.22979800  | -1.90883600 | 0.40304600  |
|                 |             |             |             |                  |             |             |             |
| <b>5'</b>       |             |             |             |                  |             |             |             |
| C               | -0.56431500 | 1.95028700  | -0.31317000 |                  |             |             |             |
| C               | -0.83711000 | 0.60895600  | -0.07979300 |                  |             |             |             |
| C               | -2.08772200 | 0.09434200  | 0.22931100  |                  |             |             |             |
| C               | -3.11267300 | 1.00707500  | 0.45987400  |                  |             |             |             |
| C               | -2.87430800 | 2.36937100  | 0.35265200  |                  |             |             |             |
| C               | -1.63107300 | 2.81990100  | -0.05650200 |                  |             |             |             |
| H               | -4.10191800 | 0.63878400  | 0.69660100  |                  |             |             |             |
| H               | -3.66737100 | 3.08099200  | 0.53549100  |                  |             |             |             |
| H               | -1.46885500 | 3.87732000  | -0.22090200 |                  |             |             |             |
| I               | 0.60045600  | -0.98579300 | -0.25478800 |                  |             |             |             |
| B               | -2.29852200 | -1.46656500 | 0.05651300  |                  |             |             |             |
| O               | -3.53144200 | -1.98688800 | 0.37249100  |                  |             |             |             |
| H               | -3.57625900 | -2.93129000 | 0.19227600  |                  |             |             |             |
| C               | 2.39099200  | 0.19889400  | 0.37898500  |                  |             |             |             |
| F               | 3.11031500  | 0.81558100  | -0.56112400 |                  |             |             |             |
| F               | 2.12873900  | 1.09014400  | 1.34038000  |                  |             |             |             |
| F               | 3.20392300  | -0.72599200 | 0.92035400  |                  |             |             |             |
| O               | -1.27302300 | -2.14629600 | -0.44155500 |                  |             |             |             |
| C               | 0.69782600  | 2.51129600  | -0.89728700 |                  |             |             |             |
| H               | 1.42044500  | 2.78816700  | -0.13275700 |                  |             |             |             |
| H               | 1.16453700  | 1.80272800  | -1.57792000 |                  |             |             |             |
| H               | 0.45710500  | 3.41028000  | -1.45996800 |                  |             |             |             |
|                 |             |             |             |                  |             |             |             |
| <b>5- anion</b> |             |             |             |                  |             |             |             |
| C               | 0.95912000  | -1.90993400 | -0.02335300 |                  |             |             |             |
| C               | 0.46158300  | -0.61307700 | -0.00316800 |                  |             |             |             |
| C               | 1.26479800  | 0.52184100  | 0.01255700  |                  |             |             |             |
| C               | 2.64600500  | 0.28220400  | 0.00178300  |                  |             |             |             |
| C               | 3.17961300  | -0.99841100 | -0.02455100 |                  |             |             |             |
| C               | 2.33362900  | -2.09984900 | -0.03587900 |                  |             |             |             |
| H               | 3.32020500  | 1.13086300  | 0.01688500  |                  |             |             |             |
| H               | 4.25198500  | -1.13959200 | -0.03445000 |                  |             |             |             |
| H               | 2.73497600  | -3.10381200 | -0.05294100 |                  |             |             |             |
| I               | -1.64850200 | -0.39172100 | 0.02089500  |                  |             |             |             |

|   |            |             |             |
|---|------------|-------------|-------------|
| C | 3.45506700 | -1.73062100 | -0.26879200 |
| H | 4.11694200 | -1.26817300 | -0.99684700 |
| H | 3.86298200 | -1.59234500 | 0.73792600  |
| H | 3.39092100 | -2.79218700 | -0.48875400 |

### 6'

|   |             |             |             |
|---|-------------|-------------|-------------|
| C | -0.53384600 | 1.93789700  | -0.38599400 |
| C | -0.75205400 | 0.59763200  | -0.11565400 |
| C | -1.98595700 | 0.07336700  | 0.28215400  |
| C | -3.02055900 | 0.96462600  | 0.55623000  |
| C | -2.80345400 | 2.32391600  | 0.38128100  |
| C | -1.59963000 | 2.80113400  | -0.10682800 |
| H | -3.98552200 | 0.60217500  | 0.87559000  |
| H | -3.60833600 | 3.01660400  | 0.58493100  |
| H | -1.47161400 | 3.85650100  | -0.30456900 |
| I | 0.62236600  | -0.99965500 | -0.30061100 |
| C | 2.37854400  | 0.19984700  | 0.44567700  |
| F | 3.14901200  | 0.79985700  | -0.46901100 |
| F | 2.04860500  | 1.12264800  | 1.35812800  |
| F | 3.17214800  | -0.68949000 | 1.07070300  |
| N | -2.08620500 | -1.31460900 | 0.36004300  |
| O | -1.30400800 | -1.89682700 | -0.66291700 |
| C | -3.41103500 | -1.89419200 | 0.34059000  |
| H | -3.96846400 | -1.55977300 | 1.21218600  |
| H | -3.95966600 | -1.62993900 | -0.56967500 |
| H | -3.30219400 | -2.97336400 | 0.39451300  |
| C | 0.71573800  | 2.49555600  | -1.00097200 |
| H | 1.42778400  | 2.82399800  | -0.24588900 |
| H | 1.20418500  | 1.76478900  | -1.64196900 |
| H | 0.45952300  | 3.36176200  | -1.60696000 |

### 6- anion

|   |             |             |             |
|---|-------------|-------------|-------------|
| C | -0.46192300 | -1.99705300 | 0.19721700  |
| C | -0.24279500 | -0.63168400 | 0.11930600  |
| C | -1.31870500 | 0.29181400  | -0.02488000 |
| C | -2.61327700 | -0.30108900 | -0.13057100 |
| C | -2.80785700 | -1.66377100 | -0.06072700 |
| C | -1.74006000 | -2.53797800 | 0.12576600  |
| H | -3.47352800 | 0.34065300  | -0.23994200 |
| H | -3.81675700 | -2.04921300 | -0.13422400 |
| H | -1.88925800 | -3.60509900 | 0.19663200  |
| I | 1.77941900  | -0.06249400 | -0.07420800 |
| H | 0.38957100  | -2.65709400 | 0.29480100  |

|   |             |            |             |
|---|-------------|------------|-------------|
| N | -1.15381500 | 1.62645200 | -0.05475900 |
| O | -0.11377100 | 2.20855000 | 0.61322800  |
| C | -2.28626000 | 2.50253600 | -0.21553100 |
| H | -2.93433200 | 2.19059800 | -1.03319900 |
| H | -2.88373500 | 2.57360200 | 0.70393000  |
| H | -1.88902500 | 3.48849500 | -0.44099200 |

### 6'- anion

|   |             |             |             |
|---|-------------|-------------|-------------|
| C | 0.23223100  | 1.91636800  | 0.12709700  |
| C | 0.20953600  | 0.52630000  | 0.05417300  |
| C | 1.38505000  | -0.25431700 | -0.05451400 |
| C | 2.59881500  | 0.45374300  | -0.15554400 |
| C | 2.63136000  | 1.83624500  | -0.10860700 |
| C | 1.46721900  | 2.56751700  | 0.05517800  |
| H | 3.52593500  | -0.09038800 | -0.24531600 |
| H | 3.58379900  | 2.34567900  | -0.17790700 |
| H | 1.49687400  | 3.64687600  | 0.11198100  |
| I | -1.66016800 | -0.43026600 | -0.11782100 |
| N | 1.33501100  | -1.63167600 | -0.07291200 |
| O | 0.60458800  | -2.20964000 | 0.96284600  |
| C | 2.57758500  | -2.33637300 | -0.26313300 |
| H | 3.09896100  | -2.00172900 | -1.16042400 |
| H | 3.24924500  | -2.23016700 | 0.60231100  |
| H | 2.33461200  | -3.39061300 | -0.37251200 |
| C | -1.01364800 | 2.74716100  | 0.25261200  |
| H | -1.63862500 | 2.65855500  | -0.63642500 |
| H | -1.61887200 | 2.42998600  | 1.10165800  |
| H | -0.75371300 | 3.79492100  | 0.38518900  |

### 7

|   |             |             |             |
|---|-------------|-------------|-------------|
| C | -0.98518500 | 1.71530700  | -0.27718600 |
| C | -1.00613000 | 0.34811700  | -0.07614800 |
| C | -2.16053700 | -0.36674000 | 0.16048800  |
| C | -3.36067400 | 0.33192800  | 0.21380600  |
| C | -3.37767000 | 1.70568500  | 0.02463800  |
| C | -2.19684200 | 2.39355800  | -0.22558300 |
| H | -4.27990500 | -0.20982100 | 0.39687100  |
| H | -4.31540800 | 2.24219100  | 0.05937400  |
| H | -2.21134700 | 3.46123300  | -0.39142500 |
| I | 0.69334100  | -0.92205800 | -0.10248700 |
| H | -0.07645800 | 2.25730800  | -0.48530700 |
| C | 2.04843700  | 0.86517800  | 0.12104100  |
| F | 2.15822800  | 1.65393900  | -0.96136400 |
| F | 1.74594300  | 1.66984600  | 1.15232500  |

|                 |             |             |             |                  |             |             |             |
|-----------------|-------------|-------------|-------------|------------------|-------------|-------------|-------------|
| F               | 3.28141400  | 0.38462300  | 0.36145100  | H                | 0.13934600  | 2.05481600  | 1.16156500  |
| O               | -0.88479100 | -2.32503500 | -0.27077500 | H                | -1.44154600 | 2.76469000  | 0.86408200  |
| C               | -2.04210000 | -1.86475400 | 0.34434600  |                  |             |             |             |
| H               | -2.92314300 | -2.34662900 | -0.08900500 | <b>7'- anion</b> |             |             |             |
| H               | -2.04853000 | -2.08026300 | 1.42338500  | C                | -1.16860800 | -1.39989900 | -0.08749000 |
|                 |             |             |             | C                | -0.51279800 | -0.17603900 | 0.06470000  |
| <b>7'</b>       |             |             |             | C                | -1.17833500 | 1.03733700  | 0.22044900  |
| C               | -1.18878400 | 1.58181900  | -0.36633400 | C                | -2.57245700 | 0.99739500  | 0.21695600  |
| C               | -1.05617700 | 0.23428300  | -0.06203500 | C                | -3.26371900 | -0.19395700 | 0.06371400  |
| C               | -2.10157000 | -0.57465100 | 0.34900400  | C                | -2.56399400 | -1.37989800 | -0.08792100 |
| C               | -3.33444400 | 0.00963900  | 0.58945600  | H                | -3.11325700 | 1.92890800  | 0.33358400  |
| C               | -3.49572600 | 1.37313600  | 0.38549300  | H                | -4.34545100 | -0.20101100 | 0.06147100  |
| C               | -2.44866900 | 2.13309600  | -0.10732700 | H                | -3.09575300 | -2.31449800 | -0.20936500 |
| H               | -4.16499600 | -0.60808000 | 0.90520900  | I                | 1.61033300  | -0.17875100 | 0.06378700  |
| H               | -4.45638600 | 1.83651500  | 0.56289400  | O                | -0.00463000 | 2.80422900  | -0.89719400 |
| H               | -2.60359100 | 3.17917400  | -0.33681500 | C                | -0.46669600 | 2.39238900  | 0.29691400  |
| I               | 0.70104400  | -0.96258800 | -0.26720900 | H                | 0.31685700  | 2.27897400  | 1.08550000  |
| C               | 2.09026700  | 0.70394800  | 0.38747300  | H                | -1.21498400 | 3.07717900  | 0.76262100  |
| F               | 2.65668900  | 1.47106300  | -0.55542500 | C                | -0.45131600 | -2.70901800 | -0.24840000 |
| F               | 1.55536900  | 1.52928400  | 1.30005100  | H                | 0.19738700  | -2.69736700 | -1.12448700 |
| F               | 3.11173900  | 0.07235400  | 1.00217300  | H                | 0.18029800  | -2.92309200 | 0.61418700  |
| O               | -0.85654200 | -2.38565400 | -0.52409700 | H                | -1.16817000 | -3.51897500 | -0.36019200 |
| C               | -1.83533500 | -2.06442800 | 0.41355000  |                  |             |             |             |
| H               | -2.76247100 | -2.60307300 | 0.20440700  | <b>8</b>         |             |             |             |
| H               | -1.52348500 | -2.32698800 | 1.43689600  | C                | -0.02110800 | 2.09743300  | -0.21247500 |
| C               | -0.14036400 | 2.43416700  | -1.01673500 | C                | -0.50046200 | 0.80378900  | -0.12659100 |
| H               | 0.47113700  | 2.96029100  | -0.28625800 | C                | -1.83784200 | 0.49182900  | 0.01410500  |
| H               | 0.51379200  | 1.84011100  | -1.65089800 | C                | -2.73681500 | 1.55112500  | 0.10095700  |
| H               | -0.62636400 | 3.18407000  | -1.63703500 | C                | -2.29123800 | 2.86237300  | 0.02476600  |
|                 |             |             |             | C                | -0.94018500 | 3.13618200  | -0.13892200 |
| <b>7- anion</b> |             |             |             | H                | 1.02507200  | 2.31954300  | -0.34785900 |
| C               | -1.08135700 | -1.63907200 | -0.17874200 | H                | -3.79145500 | 1.34853900  | 0.22749200  |
| C               | -0.50714800 | -0.39260900 | 0.02636900  | H                | -3.00277000 | 3.67383800  | 0.08635200  |
| C               | -1.26151800 | 0.75783400  | 0.23233300  | H                | -0.59276200 | 4.15663200  | -0.21461300 |
| C               | -2.64831100 | 0.60138600  | 0.21675100  | C                | -2.24025700 | -0.98245400 | 0.09259100  |
| C               | -3.25125700 | -0.63175400 | 0.00955600  | C                | -3.52647000 | -1.24572600 | -0.68288700 |
| C               | -2.46537600 | -1.75751700 | -0.18932000 | H                | -3.72737900 | -2.31640400 | -0.67147800 |
| H               | -3.26248500 | 1.48093700  | 0.37156500  | H                | -4.37914900 | -0.73542400 | -0.23714100 |
| H               | -4.32972600 | -0.71405900 | 0.00401100  | H                | -3.42135500 | -0.92095600 | -1.71738000 |
| H               | -2.91881800 | -2.72596600 | -0.34980600 | C                | -2.41757900 | -1.36496100 | 1.56544900  |
| I               | 1.60590000  | -0.30275100 | 0.03255600  | H                | -2.68205700 | -2.42020700 | 1.63355500  |
| H               | -0.46004600 | -2.51081000 | -0.32851500 | H                | -1.48873100 | -1.20330600 | 2.11438100  |
| O               | -0.20808400 | 2.64397400  | -0.79873100 | H                | -3.20324000 | -0.77352200 | 2.03543100  |
| C               | -0.64748800 | 2.15246800  | 0.37329600  | O                | -1.21704600 | -1.73695700 | -0.49345300 |

|                 |             |             |             |                  |             |             |             |
|-----------------|-------------|-------------|-------------|------------------|-------------|-------------|-------------|
| I               | 0.70603200  | -0.93522100 | -0.19391100 | H                | 3.39489800  | 0.33564300  | -0.00909300 |
| C               | 2.56099900  | 0.30274600  | 0.15332300  | H                | 3.38192600  | 2.76563900  | 0.04168600  |
| F               | 2.94934200  | 1.08687000  | -0.86754300 | H                | 1.21756600  | 3.99982000  | 0.06091400  |
| F               | 3.56350000  | -0.57264000 | 0.35581900  | C                | 1.30759900  | -1.48409700 | -0.09221900 |
| F               | 2.51896100  | 1.08795300  | 1.24219900  | O                | 0.43466000  | -1.96373500 | -0.99683300 |
|                 |             |             |             | I                | -1.85305200 | -0.06448000 | -0.01801200 |
| <b>8'</b>       |             |             |             | C                | 2.74396600  | -1.95741200 | -0.42241800 |
| C               | -0.16218800 | 2.09452900  | -0.28703800 | H                | 3.49746300  | -1.71026100 | 0.32867900  |
| C               | -0.58298900 | 0.78023600  | -0.12113600 | H                | 2.70027700  | -3.04307200 | -0.50876200 |
| C               | -1.88665600 | 0.41361100  | 0.17217000  | H                | 3.06606000  | -1.55646100 | -1.38535500 |
| C               | -2.79331100 | 1.42268800  | 0.46847700  | C                | 1.01412200  | -1.97828900 | 1.35227800  |
| C               | -2.39598900 | 2.75037800  | 0.40932500  | H                | 1.05203000  | -3.06988100 | 1.35383600  |
| C               | -1.11329100 | 3.07575000  | 0.00535200  | H                | 1.73495400  | -1.60585400 | 2.08522700  |
| H               | -3.81437400 | 1.17316200  | 0.72119100  | H                | 0.01557400  | -1.67555900 | 1.66657200  |
| H               | -3.10461000 | 3.53595600  | 0.63202300  |                  |             |             |             |
| H               | -0.83147200 | 4.11311500  | -0.11818500 | <b>8'- anion</b> |             |             |             |
| C               | -2.26831800 | -1.06846700 | 0.08712300  | C                | -0.64278300 | -1.96368700 | 0.00947600  |
| C               | -3.64010300 | -1.23834000 | -0.55715100 | C                | -0.10286100 | -0.67115300 | -0.01578500 |
| H               | -3.82933700 | -2.30295200 | -0.69066800 | C                | 1.27336900  | -0.41286800 | -0.02190800 |
| H               | -4.43494700 | -0.82667500 | 0.06283700  | C                | 2.10529800  | -1.53707500 | 0.01158600  |
| H               | -3.66559000 | -0.75474700 | -1.53292200 | C                | 1.60781000  | -2.82992200 | 0.03324600  |
| C               | -2.27188700 | -1.67974400 | 1.49229000  | C                | 0.24231200  | -3.04064300 | 0.02840800  |
| H               | -2.51246200 | -2.74065800 | 1.42344700  | H                | 3.17551000  | -1.40209300 | 0.01303400  |
| H               | -1.29675400 | -1.57474800 | 1.96867300  | H                | 2.28862200  | -3.67047000 | 0.05049500  |
| H               | -3.01430600 | -1.19159600 | 2.12360700  | H                | -0.15753500 | -4.04579300 | 0.03972900  |
| O               | -1.32744200 | -1.69609500 | -0.74302400 | C                | 1.88037600  | 1.03028700  | -0.09524700 |
| I               | 0.61597500  | -0.96858800 | -0.37010900 | C                | 3.39852100  | 0.94813500  | -0.39386000 |
| C               | 2.53085200  | -0.01165500 | 0.39184400  | H                | 3.75089700  | 1.97607800  | -0.48118900 |
| F               | 3.36972800  | 0.58128800  | -0.47011200 | H                | 3.99827200  | 0.45282900  | 0.37283200  |
| F               | 3.21599700  | -1.06411500 | 0.89122200  | H                | 3.57268400  | 0.45264900  | -1.35067900 |
| F               | 2.35292300  | 0.83853400  | 1.41633300  | C                | 1.76974000  | 1.62901000  | 1.33671400  |
| C               | 1.16921400  | 2.51888600  | -0.83246000 | H                | 2.19237900  | 2.63604400  | 1.31673200  |
| H               | 1.90181200  | 2.68390800  | -0.04530400 | H                | 0.73100700  | 1.70815800  | 1.65407300  |
| H               | 1.56569100  | 1.78211800  | -1.52708400 | H                | 2.31212000  | 1.04214400  | 2.08294800  |
| H               | 1.04935900  | 3.45844300  | -1.36740600 | O                | 1.26460200  | 1.77300400  | -1.03280800 |
|                 |             |             |             | I                | -1.52781500 | 0.91140000  | -0.01724100 |
| <b>8- anion</b> |             |             |             | C                | -2.11678400 | -2.25789100 | 0.01323300  |
| C               | 0.05596800  | 2.20058600  | 0.02285700  | H                | -2.60482000 | -1.84028600 | 0.89357200  |
| C               | 0.07869400  | 0.81103000  | -0.01536700 | H                | -2.61109700 | -1.82965600 | -0.85833900 |
| C               | 1.26774900  | 0.07782000  | -0.03193500 | H                | -2.28064200 | -3.33301100 | 0.00786600  |
| C               | 2.44149900  | 0.84207300  | -0.00315500 |                  |             |             |             |
| C               | 2.44243600  | 2.22967200  | 0.02738100  | <b>INT1</b>      |             |             |             |
| C               | 1.24184300  | 2.91923500  | 0.03873100  | C                | -5.99690100 | -1.07480100 | -2.23643500 |
| H               | -0.88950300 | 2.72358300  | 0.03866700  | C                | -5.12919900 | -1.62328200 | -1.30294000 |

|    |             |             |             |   |             |             |             |
|----|-------------|-------------|-------------|---|-------------|-------------|-------------|
| C  | -3.85135500 | -1.10722500 | -1.10386900 | O | 3.92837800  | -0.54180600 | -3.38704400 |
| C  | -3.41881800 | -0.02452800 | -1.86498700 | O | 3.37827000  | 1.84640400  | -2.82934900 |
| C  | -4.26921500 | 0.52112000  | -2.82499600 | S | 1.93416100  | -1.43926900 | -1.19274300 |
| C  | -5.54656000 | -0.00067300 | -3.00754000 | S | 3.56515000  | 0.47146100  | -2.40237500 |
| H  | -7.01077500 | -1.43422700 | -2.36538200 | C | 3.35366500  | 0.47833900  | 2.57386100  |
| H  | -2.43434600 | 0.39939700  | -1.68015600 | C | -0.41629500 | -1.33676100 | 5.50574900  |
| H  | -3.93536200 | 1.36708100  | -3.41724600 | F | 2.87892000  | 1.61725000  | 3.05918000  |
| H  | -6.21953500 | 0.43439100  | -3.73946800 | F | 4.67592700  | 0.45719200  | 2.70787900  |
| O  | -1.94537400 | -0.63224900 | 0.58374200  | F | 3.04001900  | 0.37712200  | 1.28988000  |
| O  | -3.71262700 | -2.25923200 | 1.18716900  | F | 0.64405100  | -1.74172900 | 6.18696500  |
| I  | -5.76759100 | -3.24667300 | -0.08894400 | F | -1.32198800 | -0.84624100 | 6.34386600  |
| C  | -7.20767200 | -4.02153600 | -1.54770800 | F | -0.93631100 | -2.36273100 | 4.84498600  |
| F  | -7.49895900 | -5.25646800 | -1.16290900 | N | 1.03359900  | -0.74586900 | 3.24525100  |
| F  | -8.32698000 | -3.31177600 | -1.58677200 | O | 3.01260800  | -0.78309100 | 4.87965300  |
| F  | -6.67646500 | -4.05324900 | -2.76108100 | O | 3.05659900  | -2.12709200 | 2.73987100  |
| Zn | -0.11485100 | -0.69085400 | 1.42177300  | O | 0.63435900  | 1.06149900  | 5.09873000  |
| C  | 1.17638000  | 5.91161300  | -0.44886800 | O | -1.16450100 | 0.21774700  | 3.52008600  |
| C  | 0.30494900  | 4.83937200  | -0.32012700 | S | 2.63660900  | -0.96213800 | 3.49027700  |
| C  | 0.76971500  | 3.53938100  | -0.14532000 | S | 0.05178300  | -0.00016200 | 4.30730400  |
| C  | 2.13931500  | 3.29502800  | -0.14058700 | C | 6.86142300  | -4.33997800 | -2.90233100 |
| C  | 3.02964600  | 4.35393400  | -0.30062600 | C | 8.04027300  | -4.30985400 | -1.93161700 |
| C  | 2.54892500  | 5.65233400  | -0.44511500 | H | 7.22457200  | -4.23383600 | -3.93361300 |
| H  | 0.82795400  | 6.93480800  | -0.52500200 | H | 6.35186100  | -5.31108900 | -2.83831500 |
| H  | 2.48633500  | 2.27647300  | -0.00044900 | C | 9.05569300  | -5.42165900 | -2.19183100 |
| H  | 4.09840400  | 4.16615600  | -0.29778600 | H | 8.54636500  | -3.33595900 | -1.99985400 |
| H  | 3.23772000  | 6.48510400  | -0.54511600 | H | 7.66755000  | -4.39662400 | -0.90072900 |
| O  | 0.33635700  | 1.26719900  | 1.02777600  | C | 10.23020800 | -5.38180200 | -1.21721000 |
| O  | -1.55519800 | 2.82644600  | 0.67897400  | H | 8.55036600  | -6.39424800 | -2.12100700 |
| I  | -1.79423300 | 5.15912800  | -0.34430900 | H | 9.42752000  | -5.33683200 | -3.22179800 |
| C  | -1.69117200 | 7.01288600  | -1.50425800 | H | 10.94629300 | -6.18640300 | -1.41644500 |
| F  | -2.92663700 | 7.25576800  | -1.92622400 | H | 10.76726100 | -4.42865400 | -1.29086300 |
| F  | -1.27631100 | 8.05105400  | -0.78875100 | H | 9.88317900  | -5.49000200 | -0.18269500 |
| F  | -0.89257800 | 6.87175900  | -2.55349100 | C | 5.85338800  | -3.24099800 | -2.61970800 |
| C  | 0.60687900  | -1.76220200 | -2.44817700 | H | 6.34187700  | -2.25695800 | -2.69513700 |
| C  | 5.01598400  | 0.53767300  | -1.24781200 | H | 5.46430800  | -3.34415200 | -1.59630600 |
| F  | 1.07000000  | -1.44004100 | -3.65348600 | O | 4.79290200  | -3.33616800 | -3.55959500 |
| F  | 0.30291400  | -3.05326200 | -2.43032100 | H | 4.15957600  | -2.63165000 | -3.34243000 |
| F  | -0.46897600 | -1.04212700 | -2.18499700 | S | -0.36259300 | 2.17675300  | 0.06420500  |
| F  | 5.12166500  | -0.59784600 | -0.56721600 | S | -2.77095100 | -1.80533200 | 0.13060700  |
| F  | 6.12492700  | 0.72559100  | -1.95857500 | O | -0.60856000 | 1.57304200  | -1.24323900 |
| F  | 4.87868100  | 1.54660200  | -0.39171400 | O | -1.96095100 | -2.86552500 | -0.46521100 |
| N  | 2.35548100  | 0.07206300  | -1.41647800 |   |             |             |             |
| O  | 2.93836300  | -2.45974900 | -1.43822400 |   |             |             |             |
| O  | 1.21791800  | -1.53889500 | 0.09302100  | C | 4.66752700  | 2.56485800  | -3.33640200 |

## INT2

|    |             |             |             |     |              |             |             |
|----|-------------|-------------|-------------|-----|--------------|-------------|-------------|
| C  | 4.19968300  | 2.08218000  | -2.12367000 | N   | -1.61298300  | 1.27818500  | 0.09021000  |
| C  | 2.96389400  | 1.45352500  | -1.99496700 | O   | -2.06355800  | 2.79097800  | 2.16546000  |
| C  | 2.16836000  | 1.29748200  | -3.13159300 | O   | -0.00561300  | 1.38660600  | 1.93416100  |
| C  | 2.61221000  | 1.77116900  | -4.36209700 | O   | -3.48008100  | 2.94814200  | -0.50886000 |
| C  | 3.85253600  | 2.40066100  | -4.45954900 | O   | -2.99439500  | 0.93718200  | -1.95169300 |
| H  | 5.62220000  | 3.06280700  | -3.44692600 | S   | -1.08590200  | 2.16608400  | 1.29004600  |
| H  | 1.20496400  | 0.80786500  | -3.02812100 | S   | -3.01424400  | 1.57260900  | -0.64753500 |
| H  | 1.99188300  | 1.65344400  | -5.24465700 | C   | 1.65413300   | -2.71756900 | 4.16311500  |
| H  | 4.20276400  | 2.77573400  | -5.41612900 | C   | 3.99349700   | -2.64496800 | -0.34745800 |
| C  | 2.50659400  | 0.97793600  | -0.65584600 | F   | 1.28491000   | -3.89101700 | 3.66574500  |
| O  | 1.42840700  | 0.32917600  | -0.58888000 | F   | 2.06596700   | -2.88029800 | 5.41638900  |
| O  | 3.23770900  | 1.26335400  | 0.33018300  | F   | 0.61423400   | -1.89036200 | 4.14726600  |
| I  | 5.29847100  | 2.23935500  | -0.31996500 | F   | 5.02791400   | -2.62161100 | 0.48252100  |
| C  | 7.08829000  | 3.07587700  | -1.27840000 | F   | 4.19501800   | -3.57371500 | -1.27665200 |
| F  | 8.00370200  | 3.20959200  | -0.31604400 | F   | 3.88020500   | -1.45911700 | -0.93569700 |
| F  | 7.59188800  | 2.27899100  | -2.22151700 | N   | 2.34507800   | -1.87438200 | 1.68733900  |
| F  | 6.88063300  | 4.27638000  | -1.82015100 | O   | 4.12087700   | -2.95890200 | 3.22154500  |
| Zn | 0.74895200  | -0.45735000 | 1.10848500  | O   | 3.20111800   | -0.65438600 | 3.68840400  |
| C  | -4.05693700 | -4.68680900 | -0.41655400 | O   | 2.64631600   | -4.39357300 | 1.09557000  |
| C  | -3.13935900 | -3.65103100 | -0.50715200 | O   | 1.36218000   | -2.78207500 | -0.36944000 |
| C  | -2.39403100 | -3.21581600 | 0.58531500  | S   | 3.03826900   | -1.99635500 | 3.16225700  |
| C  | -2.57176400 | -3.84993300 | 1.81611600  | S   | 2.43671800   | -3.05793000 | 0.57335500  |
| C  | -3.48192500 | -4.89551400 | 1.93502200  | C   | -6.81537100  | 5.08725900  | 1.75087600  |
| C  | -4.21854900 | -5.30702600 | 0.82500600  | C   | -8.04061000  | 5.22192800  | 0.84901400  |
| H  | -4.64666700 | -5.02844900 | -1.25737200 | H   | -6.44736100  | 6.08432700  | 2.02884600  |
| H  | -1.99008000 | -3.50897200 | 2.66704300  | H   | -7.09269400  | 4.57510700  | 2.68224700  |
| H  | -3.61991600 | -5.38873000 | 2.89173800  | C   | -9.18640800  | 5.98563300  | 1.51157200  |
| H  | -4.93265300 | -6.12006500 | 0.91226900  | H   | -7.75596600  | 5.73465900  | -0.08114600 |
| C  | -1.43984700 | -2.08186000 | 0.41985600  | H   | -8.39431600  | 4.22192900  | 0.55883400  |
| O  | -0.79482400 | -1.68110100 | 1.43021400  | C   | -10.40381000 | 6.12239200  | 0.60047100  |
| O  | -1.33593200 | -1.58491100 | -0.73026900 | H   | -9.47441600  | 5.47039800  | 2.43776400  |
| I  | -2.76716700 | -2.58922700 | -2.30082500 | H   | -8.83203500  | 6.98265700  | 1.80599200  |
| C  | -4.17792900 | -3.77133600 | -3.50226800 | H   | -11.21511000 | 6.66971800  | 1.09245900  |
| F  | -4.07550600 | -3.31065400 | -4.75292700 | H   | -10.14525800 | 6.66062000  | -0.31918200 |
| F  | -3.88784900 | -5.07410700 | -3.51918800 | H   | -10.78973800 | 5.13709800  | 0.31306600  |
| F  | -5.44942100 | -3.63812300 | -3.11830000 | C   | -5.68859700  | 4.31857900  | 1.08477100  |
| C  | -0.16310900 | 3.58601400  | 0.52972700  | H   | -5.39732800  | 4.81664300  | 0.14867100  |
| C  | -4.24326000 | 0.59290300  | 0.33403600  | H   | -6.02830400  | 3.30382700  | 0.82869100  |
| F  | -1.01753800 | 4.40999400  | -0.06012800 | O   | -4.58809700  | 4.26229500  | 1.98100800  |
| F  | 0.48332500  | 4.23512000  | 1.49181600  | H   | -3.88049600  | 3.72882500  | 1.58208900  |
| F  | 0.71189000  | 3.14663300  | -0.36578200 |     |              |             |             |
| F  | -4.32823800 | 1.07576900  | 1.56779800  |     |              |             |             |
| F  | -5.43063200 | 0.68995600  | -0.25750500 | TS1 |              |             |             |
| F  | -3.89643400 | -0.68947000 | 0.39296500  | C   | -3.47441100  | 4.23730400  | -1.92352500 |
|    |             |             |             | C   | -3.86860800  | 2.94891600  | -1.58656000 |

|    |             |             |             |            |             |             |             |
|----|-------------|-------------|-------------|------------|-------------|-------------|-------------|
| C  | -3.01411000 | 2.07479400  | -0.92192600 | O          | 2.77708400  | 3.84173000  | 2.66633500  |
| C  | -1.74430000 | 2.50778800  | -0.55101900 | O          | 5.24921700  | 3.71106800  | 2.21471000  |
| C  | -1.33968000 | 3.80483300  | -0.85684400 | S          | 2.35537900  | 1.62910500  | 0.42551400  |
| C  | -2.19902000 | 4.65927400  | -1.54304200 | S          | 3.87760400  | 3.62724600  | 1.73831400  |
| H  | -4.11222500 | 4.90849300  | -2.48651600 | C          | -4.52817900 | -4.47070600 | 1.69738200  |
| H  | -1.06925600 | 1.82739600  | -0.04108000 | C          | -2.67509800 | -0.19925100 | 3.75846100  |
| H  | -0.34619300 | 4.13372100  | -0.57032900 | F          | -4.38178600 | -4.83121800 | 2.96459500  |
| H  | -1.88259200 | 5.66404300  | -1.80433700 | F          | -5.71078300 | -4.88831200 | 1.25564200  |
| O  | -2.28778200 | -0.41910500 | -0.70743500 | F          | -3.56784700 | -5.03381500 | 0.97067800  |
| O  | -4.03996900 | 0.39844300  | 0.83878700  | F          | -3.91751700 | 0.22453800  | 3.61131800  |
| I  | -5.80745300 | 2.25148500  | -2.11061900 | F          | -2.23729500 | 0.13817500  | 4.97044300  |
| C  | -6.69180200 | 4.25044500  | -2.19682100 | F          | -1.88999400 | 0.36081800  | 2.84503400  |
| F  | -8.00779300 | 4.08021500  | -2.13826100 | N          | -2.92209700 | -2.29898400 | 2.02336800  |
| F  | -6.30563400 | 4.99070100  | -1.16585500 | O          | -5.50361000 | -2.09988600 | 2.35042500  |
| F  | -6.39766900 | 4.89459900  | -3.31934000 | O          | -4.44575100 | -2.42708300 | 0.07319300  |
| Zn | -1.50378600 | -1.90426800 | 0.46591800  | O          | -3.62005700 | -2.55783600 | 4.50027100  |
| C  | 3.23849000  | -3.82070300 | -4.29254000 | O          | -1.19758600 | -2.36965600 | 3.83938700  |
| C  | 2.89067900  | -3.70519700 | -2.94824700 | S          | -4.44771600 | -2.62580400 | 1.51283800  |
| C  | 1.65798000  | -3.15576700 | -2.57968300 | S          | -2.59456200 | -2.04629900 | 3.61357900  |
| C  | 0.77536900  | -2.72570200 | -3.57080400 | C          | 7.20774700  | 2.29079000  | -0.10332600 |
| C  | 1.12045800  | -2.84198200 | -4.91625200 | C          | 8.24511900  | 2.74613200  | 0.91961000  |
| C  | 2.34797700  | -3.39031100 | -5.27621600 | H          | 6.39347000  | 3.02552100  | -0.14497500 |
| H  | 4.19877700  | -4.24257600 | -4.57019700 | H          | 7.65704200  | 2.24145300  | -1.10418500 |
| H  | -0.17746600 | -2.29693200 | -3.28110100 | C          | 8.78992200  | 4.14134900  | 0.61652300  |
| H  | 0.42623600  | -2.50198200 | -5.67818800 | H          | 7.78868100  | 2.74774200  | 1.91883200  |
| H  | 2.62418500  | -3.48386100 | -6.32199500 | H          | 9.07742700  | 2.02799600  | 0.94885400  |
| O  | -0.12660500 | -2.22633000 | -0.96363500 | C          | 9.82159200  | 4.60550900  | 1.64141400  |
| O  | 0.90724500  | -4.39186100 | -0.37219200 | H          | 9.23732500  | 4.14563000  | -0.38666900 |
| I  | 4.32049900  | -4.35766500 | -1.55417500 | H          | 7.95247600  | 4.85196700  | 0.58810100  |
| C  | 5.03463900  | -1.66450900 | -0.99862500 | H          | 10.19706800 | 5.60777900  | 1.40823000  |
| F  | 4.79492100  | -1.73494500 | 0.23043600  | H          | 9.38607800  | 4.63593800  | 2.64727300  |
| F  | 6.22212600  | -1.81154200 | -1.39618000 | H          | 10.67995900 | 3.92377700  | 1.66956100  |
| F  | 4.17127700  | -1.22530500 | -1.79390200 | C          | 6.61202600  | 0.93517400  | 0.23653900  |
| C  | 2.10713400  | 0.40598000  | 1.79530600  | H          | 6.17369400  | 0.94829900  | 1.24326700  |
| C  | 3.73624600  | 5.02178300  | 0.52573500  | H          | 7.37772700  | 0.15208900  | 0.20263800  |
| F  | 2.00516300  | 1.04664500  | 2.95829100  | O          | 5.61140600  | 0.55609900  | -0.71498300 |
| F  | 0.98343800  | -0.27389000 | 1.58486600  | H          | 4.83569600  | 1.12873500  | -0.56509500 |
| F  | 3.13187900  | -0.43406500 | 1.86008400  | S          | -3.52678200 | 0.40918700  | -0.52945800 |
| F  | 2.55625400  | 4.99033000  | -0.08667000 | S          | 1.15821300  | -3.02932500 | -0.85874300 |
| F  | 3.85382900  | 6.17894200  | 1.17559000  | O          | -4.52594400 | 0.12226500  | -1.59475700 |
| F  | 4.69771000  | 4.94648400  | -0.39131300 | O          | 2.20106800  | -2.28436200 | -0.14855700 |
| N  | 3.75134200  | 2.32742000  | 0.80184400  |            |             |             |             |
| O  | 1.17153600  | 2.47453300  | 0.47821900  |            |             |             |             |
| O  | 2.60994900  | 0.82006800  | -0.75939700 |            |             |             |             |
|    |             |             |             | <b>TS2</b> |             |             |             |
|    |             |             |             | C          | 3.56563100  | 4.65445800  | 0.97540300  |

|    |             |             |             |   |              |             |             |
|----|-------------|-------------|-------------|---|--------------|-------------|-------------|
| C  | 3.64214300  | 3.27062200  | 1.01575600  | N | -3.89940800  | 2.36596900  | -0.81875300 |
| C  | 2.54164600  | 2.45201300  | 0.77324100  | O | -1.69308400  | 3.72621900  | -1.00951800 |
| C  | 1.31428500  | 3.05033100  | 0.48344200  | O | -1.92581500  | 1.75902600  | 0.53917500  |
| C  | 1.20618300  | 4.43632600  | 0.43573900  | O | -4.07079300  | 3.88804300  | -2.91445300 |
| C  | 2.32658100  | 5.22929300  | 0.68065900  | O | -6.06280900  | 2.66257000  | -1.97445100 |
| H  | 4.41477400  | 5.29889800  | 1.16210900  | S | -2.29886600  | 2.44280900  | -0.69033900 |
| H  | 0.45608300  | 2.40918300  | 0.31169700  | S | -4.77715600  | 3.31523300  | -1.78091100 |
| H  | 0.24956400  | 4.89439200  | 0.20668500  | C | 3.98025100   | -4.80706400 | -0.16494900 |
| H  | 2.24974200  | 6.31159700  | 0.64601200  | C | 4.89749600   | -0.13748400 | -1.99661900 |
| C  | 2.69080500  | 0.96851600  | 0.82937100  | F | 3.73112800   | -5.04554300 | -1.44537500 |
| O  | 1.68897500  | 0.24710200  | 0.56305100  | F | 4.75725500   | -5.76947900 | 0.32004600  |
| O  | 3.82763200  | 0.52394700  | 1.14360800  | F | 2.83305700   | -4.78731800 | 0.50883200  |
| I  | 5.43714400  | 2.23683300  | 1.45602200  | F | 5.87800100   | -0.35887800 | -1.13135200 |
| C  | 6.65415800  | 4.05629400  | 1.67033300  | F | 5.41720900   | 0.08254300  | -3.19934700 |
| F  | 7.89151100  | 3.64117000  | 1.95319200  | F | 4.21290500   | 0.93669200  | -1.62249600 |
| F  | 6.70759100  | 4.78616900  | 0.55527400  | N | 3.69674200   | -2.16112400 | -0.56566900 |
| F  | 6.24987100  | 4.85075400  | 2.66312700  | O | 6.04060500   | -3.24091900 | -0.76750600 |
| Zn | 1.85763600  | -1.76917200 | 0.53440600  | O | 4.91268900   | -2.98542200 | 1.47108600  |
| C  | -3.92046100 | -4.86435800 | 1.32262100  | O | 4.39896100   | -2.52188700 | -3.03474600 |
| C  | -2.87776600 | -4.20795400 | 0.67037700  | O | 2.45194400   | -1.05281800 | -2.39614900 |
| C  | -1.62098400 | -4.05819800 | 1.26421500  | S | 4.83527800   | -3.17542700 | 0.03477600  |
| C  | -1.43321600 | -4.58204200 | 2.54814400  | S | 3.75932500   | -1.61457700 | -2.10324600 |
| C  | -2.45834300 | -5.25959400 | 3.20394500  | C | -7.49324100  | 0.35590900  | 2.08359200  |
| C  | -3.70172000 | -5.40294400 | 2.59029500  | C | -9.01360800  | 0.46860300  | 1.98701300  |
| H  | -4.89268100 | -4.95390600 | 0.84859000  | H | -7.13184600  | 0.90198200  | 2.96458500  |
| H  | -0.46414000 | -4.46027500 | 3.02329300  | H | -7.20771300  | -0.69632500 | 2.21476300  |
| H  | -2.28665500 | -5.67184800 | 4.19360600  | C | -9.72722600  | -0.07772300 | 3.22269400  |
| H  | -4.50913200 | -5.92493200 | 3.09492200  | H | -9.29322600  | 1.52225400  | 1.84427500  |
| C  | -0.43878400 | -3.42123000 | 0.57022400  | H | -9.36565900  | -0.07250200 | 1.09711700  |
| O  | 0.20711100  | -2.56928400 | 1.29328300  | C | -11.24570800 | 0.04216500  | 3.12062600  |
| O  | -0.15253700 | -3.75400000 | -0.57907200 | H | -9.44837200  | -1.13053400 | 3.36394600  |
| I  | -3.32635800 | -3.33046600 | -1.18930500 | H | -9.37306900  | 0.46186600  | 4.11118400  |
| C  | -4.50554400 | -1.06167100 | -0.00066000 | H | -11.74084400 | -0.35471900 | 4.01335700  |
| F  | -4.81606700 | -0.56330800 | -1.11872700 | H | -11.54830300 | 1.08986700  | 3.00672700  |
| F  | -5.35748400 | -1.73985300 | 0.63605800  | H | -11.62420100 | -0.51085500 | 2.25278300  |
| F  | -3.43119700 | -0.71561200 | 0.55897500  | C | -6.80896000  | 0.91479000  | 0.85017500  |
| C  | -1.71988300 | 1.30239000  | -2.03176100 | H | -7.04747500  | 1.97708900  | 0.73043800  |
| C  | -5.16178000 | 4.75124700  | -0.67505200 | H | -7.14846500  | 0.39112100  | -0.05552900 |
| F  | -2.16096900 | 1.71024800  | -3.21564800 | O | -5.38738500  | 0.76175600  | 0.98511900  |
| F  | -0.39041200 | 1.28346000  | -2.04282900 | H | -4.93023500  | 1.46434400  | 0.47372500  |
| F  | -2.16578500 | 0.06625500  | -1.80816100 |   |              |             |             |
| F  | -4.04681400 | 5.37838900  | -0.31878400 |   |              |             |             |
| F  | -5.95317100 | 5.60327200  | -1.32214700 |   |              |             |             |
| F  | -5.78698500 | 4.32745100  | 0.42110100  |   |              |             |             |
